# Supplementary material for: Protein Malnutrition Impairs Intestinal Epithelial Cell Turnover, a Potential Mechanism of Increased Cryptosporidiosis in a Murine Model
Source: PubMed Central journal article supplement (PMC5116730; doi:10.1128/iai.00705-16), 2016-11-18
Supplement: IAI.00705-16_zii012161911so1.pdf [file IAI.00705-16_zii012161911so1.pdf]

## Supplemental Table 1. Rodent diet composition

|                            | dN          |             | dPD         |             |
|----------------------------|-------------|-------------|-------------|-------------|
| %                          | gm          | kcal        | gm          | kcal        |
| Protein                    | 20          | 20.5        | 2           | 2           |
| Carbohydrate               | 66.3        | 68          | 84          | 86          |
| Fat                        | 5           | 11.5        | 5           | 12          |
| Total                      |             | 100         |             | 100         |
| kcal/gm                    | 3.9         |             | 3.9         |             |
|                            |             |             |             |             |
| <b>Ingredient</b>          | <b>gm</b>   | <b>kcal</b> | <b>gm</b>   | <b>kcal</b> |
| Egg Whites, Spray Dried    | 200         | 800         | 20          | 80          |
|                            |             |             |             |             |
| Corn Starch                | 150         | 600         | 330         | 1320        |
| Sucrose                    | 502.5       | 2010.2      | 502.5       | 2010        |
|                            |             |             |             |             |
| Cellulose, BW200           | 50          | 0           | 50          | 0           |
|                            |             |             |             |             |
| Corn Oil                   | 50          | 450         | 50          | 450         |
|                            |             |             |             |             |
| Mineral Mix S19401         | 35          | 0           | 35          | 0           |
|                            |             |             |             |             |
| Vitamin Mix V10001         | 10          | 40          | 10          | 40          |
| Choline Bitartrate         | 2           | 0           | 2           | 0           |
|                            |             |             |             |             |
| Biotin, 1%                 | 0.4         | 0           | 0.4         | 0           |
| Zinc Carbonate, 52.1% Zinc | 0.056       | 0           | 0.056       | 0           |
|                            |             |             |             |             |
| <b>Total</b>               | <b>1000</b> | <b>3900</b> | <b>1000</b> | <b>3900</b> |

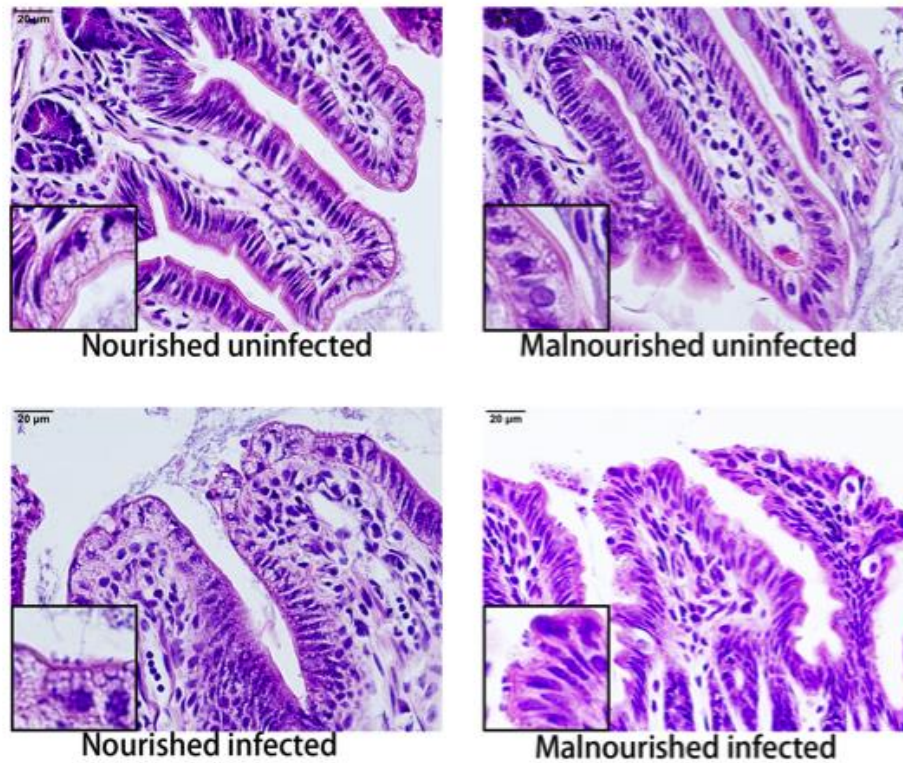

**FIG S1** Ileal histology in nourished and malnourished uninfected and infected mice at 72 hours after challenge. Images in left-lower corner of each picture represented high-power magnification of a selected villus, showing cryptosporidial parasites at the enterocyte apical surface of infected mice, H&E  $\times 400$ .

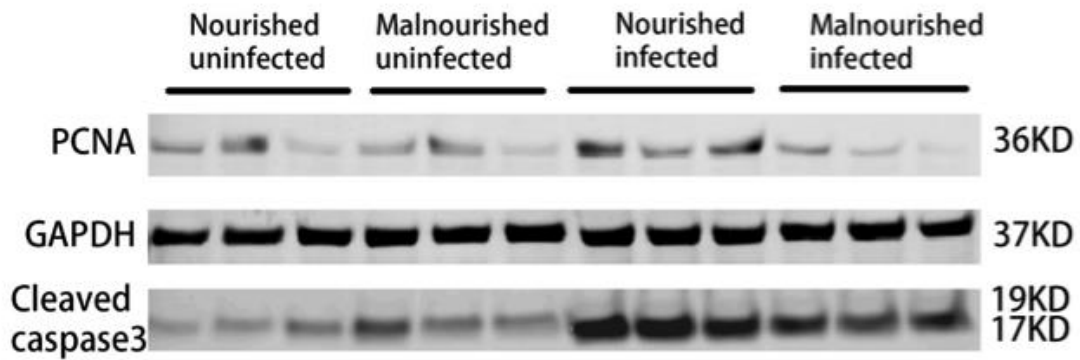

**FIG S2** Protein malnutrition suppressed the expression of cleaved caspase 3 and PCNA induced by *C. parvum* at 72 hours after challenge. C57BL/6 mice at postnatal day 28 were fed with an isocaloric low-protein (2% protein) diet or the regular diet containing 20% protein and simultaneously challenged with  $2 \times 10^7$  unexcysted oocysts per mouse, then euthanized 72 hours later. Equal amount of total proteins from ileal epithelial cells were Western blotted against Cleaved caspase 3, PCNA and GAPDH antibodies.
